# Supplementary material for: Everything feels just a little heavier, more wrought with implications, you know? – a mixed-methods study examining lifestyle behaviors, health, and well-being of pregnant and postpartum women during the early months of the COVID-19 pandemic
Source: PubMed Central journal article supplement — BMC Pregnancy Childbirth. 2025 Jan 7;25:9. doi: 10.1186/s12884-024-07011-y (PMC11706056; doi:10.1186/s12884-024-07011-y), 2025-01-07
Supplement: 12884_2024_7011_MOESM1_ESM.pdf [file 12884_2024_7011_MOESM1_ESM.pdf]

## Supporting information

**S1 Table. Interview guide**

---

| <b>Question</b>                                                                                   | <b>Probe</b>                                                                                                                                                                                                                                                                                                                                                                                                                                                                                                                                                                                                                                                                                                                             |
|---------------------------------------------------------------------------------------------------|------------------------------------------------------------------------------------------------------------------------------------------------------------------------------------------------------------------------------------------------------------------------------------------------------------------------------------------------------------------------------------------------------------------------------------------------------------------------------------------------------------------------------------------------------------------------------------------------------------------------------------------------------------------------------------------------------------------------------------------|
| 1. Can you describe how the COVID-19 pandemic affected you and your family?                       | <ol style="list-style-type: none"><li>a. Describe how the COVID-19 pandemic affected your health.<ol style="list-style-type: none"><li>i. Were there any differences between how your health was affected during your pregnancy and now?</li><li>ii. How has the pandemic affected your baby's health?</li></ol></li><li>b. How did recommendations/restrictions for the pandemic shape your health decisions?<ol style="list-style-type: none"><li>i. How has the pandemic affected your decisions for your baby's health or how you feed your baby?</li><li>ii. How has the pandemic affected decisions you're making now, or decisions you're planning to make, for your baby's health or how you feed your baby?</li></ol></li></ol> |
| 2. Did your eating behaviors change during the pandemic?                                          | <ol style="list-style-type: none"><li>a. Did your food sources (where you purchase your food) change?</li><li>b. In the COVID-19 survey, we asked if you have been eating more or less food. Has your response changed?</li><li>c. How about the types of foods you eat? Are you eating more or less of certain types of foods?</li><li>d. Have there been any changes in how you eat over time?</li></ol>                                                                                                                                                                                                                                                                                                                               |
| 3. Can you describe how the pandemic changed your activity levels?                                | <ol style="list-style-type: none"><li>a. What made it harder/easier to stay active during the pandemic?</li><li>b. Have there been any changes in how active you are over time?</li></ol>                                                                                                                                                                                                                                                                                                                                                                                                                                                                                                                                                |
| 4. Can you describe how the pandemic affected your sleeping habits?                               | <ol style="list-style-type: none"><li>a. Have there been any changes in how you sleep over time?</li></ol>                                                                                                                                                                                                                                                                                                                                                                                                                                                                                                                                                                                                                               |
| 5. What emotions did you feel as you became more aware of COVID?                                  | <ol style="list-style-type: none"><li>a. Have there been any changes in your mood or stress over time?</li><li>b. What were some factors in your life that made you feel stressed?</li><li>c. Who or what helped you manage stress?</li></ol>                                                                                                                                                                                                                                                                                                                                                                                                                                                                                            |
| 6. Can you explain how the pandemic affected your health care?                                    | <ol style="list-style-type: none"><li>a. Were the topics you and your health care providers discussed different during your appointments after public awareness about COVID-19 started to grow?</li><li>b. Were any of your appointments converted from in-person appointments to virtual (telehealth/video), or were any canceled?</li><li>c. Did the pandemic change your birth plan?</li><li>d. How has the pandemic changed your baby's health care?</li></ol>                                                                                                                                                                                                                                                                       |
| 7. What sources did you go to know what precautions to take for COVID during and after pregnancy? | <ol style="list-style-type: none"><li>a. Did you find this information helpful?</li></ol>                                                                                                                                                                                                                                                                                                                                                                                                                                                                                                                                                                                                                                                |
| 8. Is there anything else you want to share?                                                      |                                                                                                                                                                                                                                                                                                                                                                                                                                                                                                                                                                                                                                                                                                                                          |

---

**S2 Table. Quantitative results for first-time mothers compared to mothers with children, and pregnant and postpartum mothers**

| Variable                                                           | n (%) or Mean ( $\pm$ SD)   |                               |                           |                            |
|--------------------------------------------------------------------|-----------------------------|-------------------------------|---------------------------|----------------------------|
|                                                                    | First-time mothers<br>n= 12 | Mothers with children<br>n= 9 | Pregnant mothers<br>n= 15 | Postpartum mothers<br>n= 6 |
| No employment changes                                              | 8 (67)                      | 5 (56)                        | 9 (60)                    | 4 (67)                     |
| Daycare/school closed                                              | 2 (17)                      | 8 (89)                        | 6 (40)                    | 4 (67)                     |
| ANC/PNC format changed                                             | 9 (75)                      | 4 (44)                        | 11 (73)                   | 2 (33)                     |
| No birth plan changes                                              | 6 (50)                      | 7 (78)                        | 10 (67)                   | 3 (50)                     |
| Eating same amount                                                 | 7 (58)                      | 5 (56)                        | 10 (67)                   | 2 (33)*                    |
| Eating more                                                        | 4 (33)                      | 3 (33)                        | 3 (20)                    | 4 (67)                     |
| Eating more home cooked meals                                      | 8 (67)                      | 7 (78)                        | 11 (73)                   | 4 (67)                     |
| Less physical activity                                             | 9 (75)                      | 4 (44)                        | 10 (67)                   | 3 (50)                     |
| More screen-time                                                   | 6 (50)                      | 8 (89)                        | 10 (67)                   | 4 (67)                     |
| Sleeping same amount                                               | 7 (58)                      | 7 (78)                        | 12 (80)                   | 2 (33)*                    |
| Sleeping less                                                      | 2 (17)                      | 2 (22)                        | 0 (0)                     | 4 (67)                     |
| Talk with friends/family same                                      | 5 (42)                      | 4 (44)                        | 6 (40)                    | 3 (50)                     |
| Talk with medical provider same                                    | 6 (50)                      | 6 (67)                        | 10 (67)                   | 2 (33)                     |
| Talk with medical provider more                                    | 2 (17)                      | 1 (11)                        | 2 (13)                    | 1 (17)                     |
| Talk with medical provider less                                    | 2 (17)                      | 2 (22)                        | 3 (20)                    | 1 (17)                     |
| Talk with mental health provider same                              | 1 (8)                       | 3 (33)                        | 3 (20)                    | 1 (17)                     |
| Talk with mental health provider more                              | 0 (0)                       | 1 (11)                        | 0 (0)                     | 1 (17)                     |
| COVID-19 had a negative impact                                     | 10 (83)                     | 7 (78)                        | 11 (73)                   | 6 (100)                    |
| General stress                                                     | 2.4 ( $\pm$ 0.2)            | 2.2 ( $\pm$ 0.4)              | 2.2 ( $\pm$ 0.2)          | 2.7 ( $\pm$ 0.5)           |
| Change in stress level                                             | 0.8 ( $\pm$ 0.5)            | 1.6 ( $\pm$ 0.6)              | 1.0 ( $\pm$ 0.5)          | 1.5 ( $\pm$ 0.4)           |
| Perceived stress                                                   | 5.1 ( $\pm$ 0.7)            | 5.1 ( $\pm$ 1.3)              | 4.8 ( $\pm$ 0.8)          | 5.8 ( $\pm$ 1.4)           |
| Acute stress                                                       | 2.5 ( $\pm$ 0.2)            | 2.2 ( $\pm$ 0.2)              | 2.3 ( $\pm$ 0.1)          | 2.4 ( $\pm$ 0.3)           |
| Concerns overall                                                   | 2.3 ( $\pm$ 0.1)            | 2.2 ( $\pm$ 0.2)              | 2.3 ( $\pm$ 0.1)          | 2.3 ( $\pm$ 0.3)           |
| Impact on your community                                           | 3.7 ( $\pm$ 0.3)            | 3.3 ( $\pm$ 0.4)              | 3.3 ( $\pm$ 0.3)          | 4.0 ( $\pm$ 0.4)           |
| An elderly relative or family friend will get COVID-19             | 3.2 ( $\pm$ 0.3)            | 3.2 ( $\pm$ 0.4)              | 3.1 ( $\pm$ 0.2)          | 3.5 ( $\pm$ 0.6)           |
| Worries overall                                                    | 2.4 ( $\pm$ 0.2)            | 2.0 ( $\pm$ 0.2)              | 2.1 ( $\pm$ 0.2)          | 2.6 ( $\pm$ 0.3)           |
| Being separated from my baby after delivery                        | 3.2 ( $\pm$ 0.3)            | 2.4 ( $\pm$ 0.5)              | 2.7 ( $\pm$ 0.3)          | 3.4 ( $\pm$ 0.4)           |
| Contracting the coronavirus and not being able to care for my baby | 2.9 ( $\pm$ 0.4)            | 2.5 ( $\pm$ 0.4)              | 2.6 ( $\pm$ 0.3)          | 3.2 ( $\pm$ 0.6)           |
| Changing my plans to breastfeed                                    | 1.8 ( $\pm$ 0.4)*           | 0.3 ( $\pm$ 0.2)              | 0.7 ( $\pm$ 0.3)          | 2.4 ( $\pm$ 0.6)*          |
| Resilience                                                         | 3.7 ( $\pm$ 0.2)            | 4.1 ( $\pm$ 0.3)              | 4.0 ( $\pm$ 0.2)          | 3.7 ( $\pm$ 0.4)           |

\**p* value < 0.05
